# Supplementary material for: Natural history of Waldenström macroglobulinemia following acquired resistance to ibrutinib monotherapy
Source: PubMed Central journal article supplement — Haematologica. 2021 Jun 24;107(5):1163–71. doi: 10.3324/haematol.2021.279112 (PMC9052900; doi:10.3324/haematol.2021.279112), 2021-06-24
Supplement: 2021_279112_GUSTINE_SUPPL.pdf [file 2021_279112_GUSTINE_SUPPL.pdf]

## Natural history of Waldenström macroglobulinemia following acquired resistance to ibrutinib monotherapy

Joshua N. Gustine,<sup>1,2</sup> Shayna Sarosiek,<sup>1,3</sup> Catherine A. Flynn,<sup>1</sup> Kirsten Meid,<sup>1</sup> Carly Leventoff,<sup>1</sup> Timothy White,<sup>1</sup> Maria Luisa Guerrero,<sup>1</sup> Lian Xu,<sup>1</sup> Amanda Kofides,<sup>1</sup> Nicholas Tsakmaklis,<sup>1</sup> Manit Munshi,<sup>1</sup> Maria Demos,<sup>1</sup> Christopher J. Patterson,<sup>1</sup> Xia Liu,<sup>1</sup> Guang Yang,<sup>1,3</sup> Zachary R. Hunter,<sup>1,3</sup> Andrew R. Branagan,<sup>3,4</sup> Steven P. Treon<sup>1,3</sup> and Jorge J. Castillo<sup>1,3</sup>

<sup>1</sup>Bing Center for Waldenström's Macroglobulinemia, Dana-Farber Cancer Institute; <sup>2</sup>Boston University School of Medicine; <sup>3</sup>Department of Medicine, Harvard Medical School and <sup>4</sup>Division of Medical Oncology, Massachusetts General Hospital, Boston, MA, USA

©2022 Ferrata Storti Foundation. This is an open-access paper. doi:10.3324/haematol.2021.279112

Received: April 28, 2021.

Accepted: June 16, 2021.

Pre-published: June 24, 2021.

Correspondence: *JORGE J. CASTILLO* - [jorgej\\_castillo@dfci.harvard.edu](mailto:jorgej_castillo@dfci.harvard.edu)

---

**SUPPLEMENTAL APPENDIX:**

**Table S1.** Univariate logistic regression analysis for factors at T<sub>0</sub> predictive of IgM rebound.....2

**Table S2.** Univariate logistic regression analysis for factors at T<sub>0</sub> predictive of an objective response to the first salvage regimen.....3

**Table S3.** Comparison of clinical characteristics at T<sub>0</sub> between ibrutinib-resistant WM patients with BTK<sup>C481S</sup> and BTK<sup>WT</sup> .....4

**Figure S1.** Serial IgM measurements for patients with an IgM rebound who developed symptomatic hyperviscosity.....5

**Figure S2.** Overall survival from WM diagnosis.....6

**Figure S3.** Overall survival following ibrutinib discontinuation stratified by quadruple-class exposed status.....7

**Figure S4.** Cumulative incidence of ibrutinib discontinuation stratified by BTK mutation status.....8

**Figure S5.** Overall survival following ibrutinib discontinuation stratified by BTK mutation status.....9

**Figure S6.** Overall survival following ibrutinib discontinuation stratified by TP53 mutation status.....10

**Table S1. Univariate logistic regression analysis for factors at T<sub>0</sub> predictive of IgM rebound.**

| <b>Variable</b>                    | <b>OR (95% CI)</b> | <b>P-value</b> |
|------------------------------------|--------------------|----------------|
| Age >65 years                      | 1.97 (0.51-7.78)   | 0.36           |
| >2 years from ibrutinib initiation | 0.97 (0.26-3.57)   | 1.00           |
| >10 years from WM diagnosis        | 1.38 (0.37-5.46)   | 0.77           |
| Male sex                           | 1.60 (0.41-6.31)   | 0.54           |
| Hemoglobin level <10 g/dl          | 2.56 (0.65-11.6)   | 0.15           |
| Platelet count <100 K/ul           | 3.44 (0.73-22.6)   | 0.11           |
| Serum IgM level >4000 mg/dl        | 1.35 (0.17-16.5)   | 1.00           |
| >4 prior therapies                 | 2.18 (0.33-24.7)   | 0.45           |
| Quadruple-class exposed            | 0.77 (0.37-5.46)   | 0.77           |
| MYD88 mutation                     | 3.24 (0.16-204.1)  | 0.55           |
| CXCR4 mutation                     | 0.99 (0.27-3.39)   | 1.00           |

Previous therapy includes ibrutinib monotherapy for all patients. Patients who had been previously treated with ibrutinib, rituximab, proteasome inhibitor, and alkylating agent were considered to be “quadruple-class exposed.” MYD88 and CXCR4 mutation status was available for 46 and 40 patients, respectively.

**Table S2. Univariate logistic regression analysis for factors at T<sub>0</sub> predictive of an objective response to the first salvage regimen.**

| <b>Variable</b>                    | <b>OR (95% CI)</b> | <b>P-value</b> |
|------------------------------------|--------------------|----------------|
| Age >65 years                      | 1.85 (0.51-6.96)   | 0.38           |
| >2 years from ibrutinib initiation | 1.23 (0.34-4.56)   | 0.78           |
| >10 years from WM diagnosis        | 0.96 (0.25-3.67)   | 1.00           |
| Male sex                           | 0.59 (0.14-2.28)   | 0.54           |
| Hemoglobin level <10 g/dl          | 0.27 (0.06-1.04)   | 0.06           |
| Platelet count <100 K/ul           | 0.26 (0.05-1.07)   | 0.06           |
| Serum IgM level >4000 mg/dl        | 1.70 (0.31-12.0)   | 0.71           |
| >4 prior therapies                 | 0.68 (0.07-3.64)   | 0.68           |
| Quadruple-class exposed            | 0.22 (0.05-0.88)   | 0.02           |
| MYD88 mutation                     | 2.39 (0.12-150)    | 0.59           |
| CXCR4 mutation                     | 2.09 (0.55-6.93)   | 0.33           |

Previous therapy includes ibrutinib monotherapy for all patients. Patients who had been previously treated with ibrutinib, rituximab, proteasome inhibitor, and alkylating agent were considered to be “quadruple-class exposed.” MYD88 and CXCR4 mutation status was available for 46 and 40 patients, respectively.

**Table S3. Comparison of clinical characteristics at T<sub>0</sub> between ibrutinib-resistant WM patients with BTK<sup>C481S</sup> and BTK<sup>WT</sup>.**

| Patient Characteristic                 | BTK C481S<br>(n=7) | BTK WT<br>(n=14)   | P-value |
|----------------------------------------|--------------------|--------------------|---------|
| Median age (range) – yrs               |                    |                    |         |
| WM diagnosis                           | 63<br>(52-91)      | 60<br>(43-66)      | 0.15    |
| Ibrutinib initiation                   | 71<br>(61-93)      | 66<br>(43-79)      | 0.15    |
| Ibrutinib discontinuation              | 73<br>(64-93)      | 68<br>(43-80)      | 0.16    |
| Median time from WM dx (range) – yrs   | 9.4<br>(2.8-24)    | 9.7<br>(0.6-23)    | 0.69    |
| Male sex – no. (%)                     | 6 (86)             | 10 (71)            | 0.62    |
| Median hemoglobin level (range) – g/dl | 9.3<br>(7.7-11.2)  | 10.3<br>(7.3-15.3) | 0.23    |
| Median platelet count (range) – K/ul   | 148<br>(20-222)    | 189<br>(52-463)    | 0.25    |
| Median serum IgM level                 | 825<br>(407-3970)  | 1869<br>(314-6516) | 0.17    |
| Previous therapy                       |                    |                    |         |
| Median no. of treatment (range)        | 3<br>(1-9)         | 3<br>(1-7)         | 0.13    |
| Quadruple-class exposed – no. (%)      | 5 (71)             | 6 (43)             | 0.36    |
| MYD88 mutation – no. (%)               | 7 (100)            | 14 (100)           | UTC     |
| CXCR4 mutation – no. (%)               | 5 (71)             | 7 (50)             | 0.64    |

Genotyping for BTK mutations was available for 21 WM patients with acquired ibrutinib resistance, and the characteristics of these patients are depicted in the table. Previous therapy includes ibrutinib monotherapy for all patients. Patients who had been previously treated with ibrutinib, rituximab, proteasome inhibitor, and alkylating agent were considered to be “quadruple-class exposed.” UTC: unable to calculate.

**Figure S1. Serial IgM measurements for patients with an IgM rebound who developed symptomatic hyperviscosity.** Serial serum IgM measurements were available for 7 out of 10 patients (70%) who developed symptomatic hyperviscosity from an IgM rebound after discontinuing ibrutinib. Emergent plasmapheresis was administered at the last IgM level for each patient.

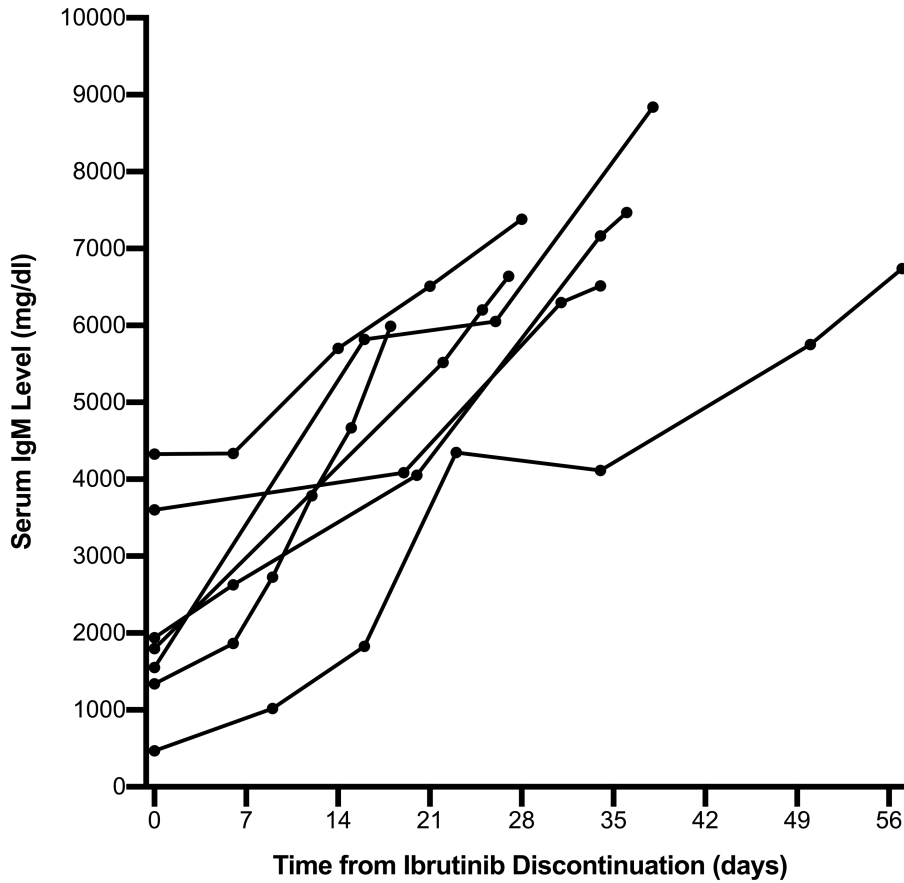

**Figure S2. Overall survival from WM diagnosis.** Kaplan-Meier curve for overall survival (OS) from the time of WM diagnosis for the entire cohort. The median OS was 20.4 years (95% CI 13.2-NR).

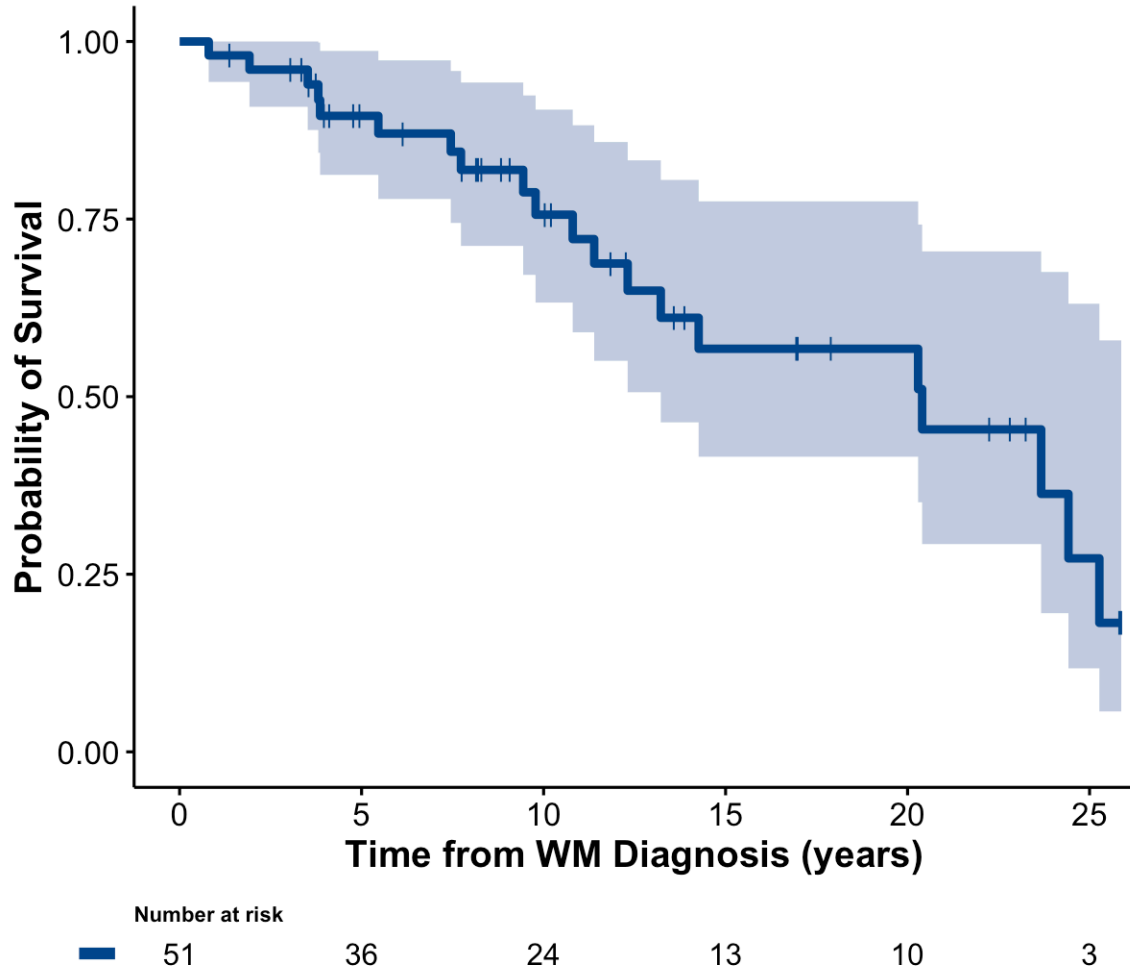

**Figure S3. Overall survival following ibrutinib discontinuation stratified by quadruple-class exposed status.** Kaplan-Meier curves for overall survival (OS) from the time of ibrutinib discontinuation ( $T_0$ ). Previous therapy includes ibrutinib monotherapy for all patients. Patients who had been previously treated with ibrutinib, rituximab, proteasome inhibitor, and alkylating agent were considered to be “quadruple-class exposed.” Patients with and without quadruple-class exposed disease had a median OS following  $T_0$  of 13.2 months and NR, respectively ( $p < 0.001$ ). The 5-year OS for patients without quadruple-class exposed disease was 62% (95% CI 38-98%).

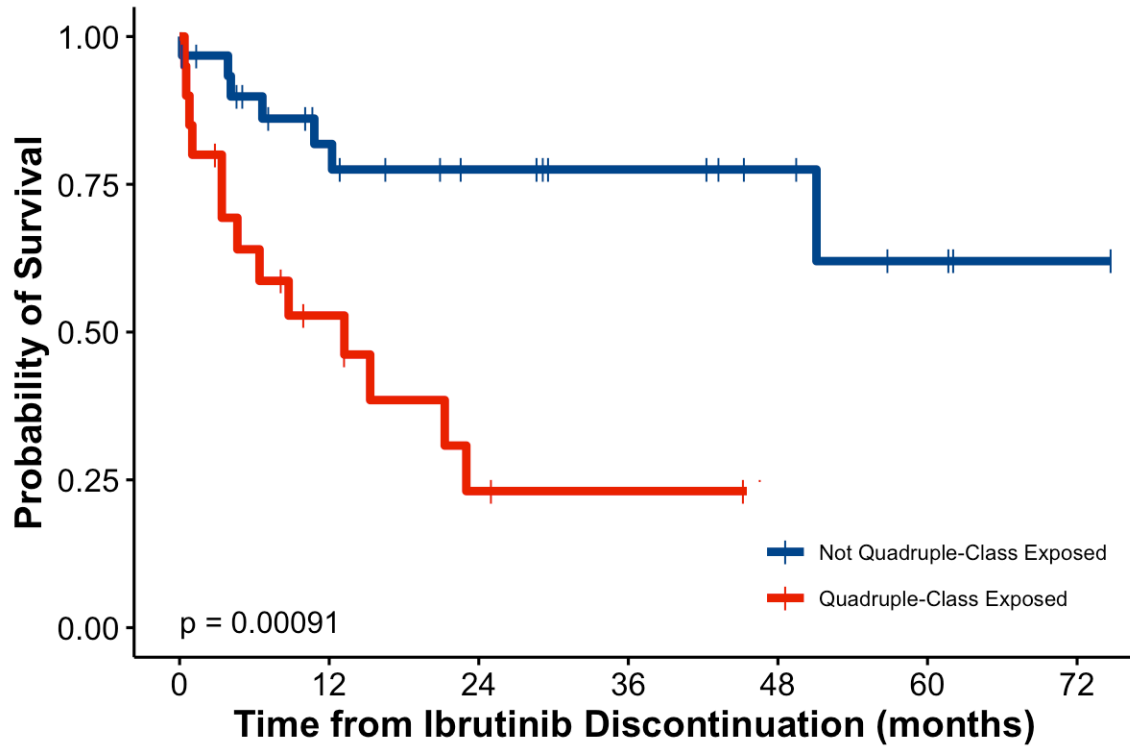

Number at risk

|   |    |    |    |   |   |   |   |
|---|----|----|----|---|---|---|---|
| ■ | 31 | 19 | 13 | 9 | 6 | 3 | 1 |
| ■ | 20 | 8  | 3  | 2 | 0 | 0 | 0 |



**Figure S4. Cumulative incidence of ibrutinib discontinuation stratified by BTK mutation status.** Kaplan-Meier curves for the duration of time between ibrutinib initiation and discontinuation. There was no difference in the time to ibrutinib discontinuation between patients with BTK<sup>C481S</sup> and BTK<sup>WT</sup> (1.9 vs. 1.8 years; p=0.50).

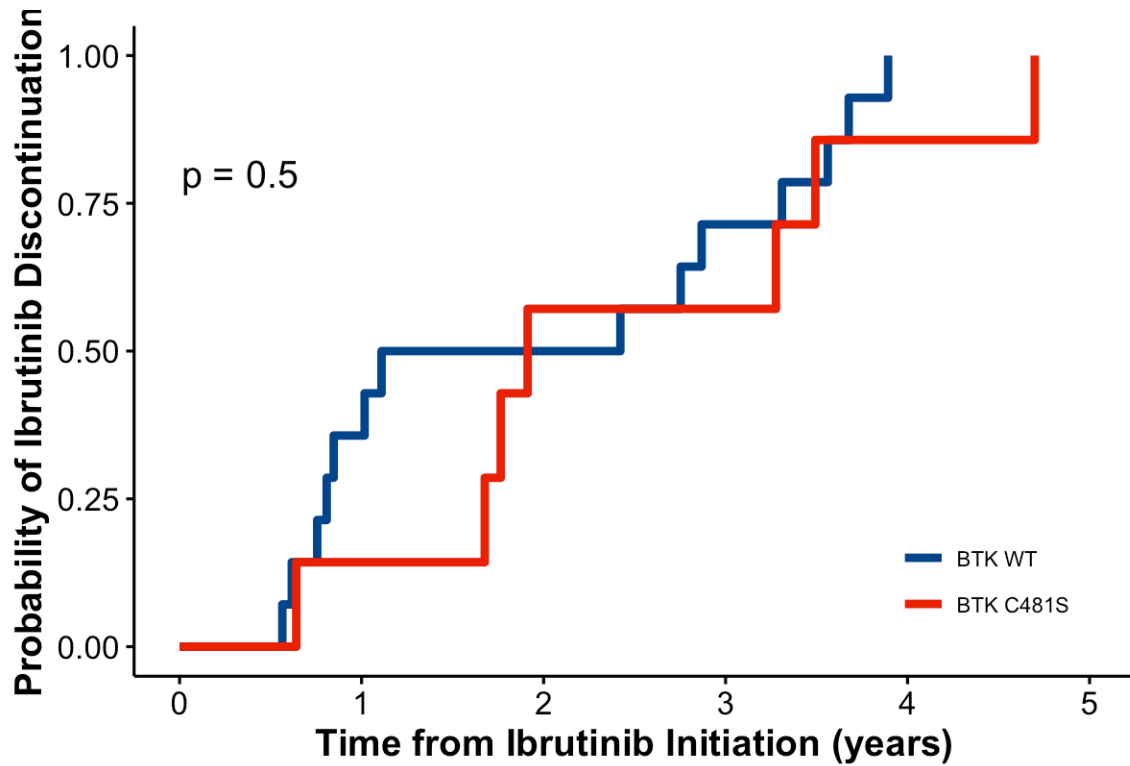

Number at risk

|   |    |   |   |   |   |   |
|---|----|---|---|---|---|---|
| ■ | 14 | 9 | 7 | 4 | 0 | 0 |
| ■ | 7  | 6 | 3 | 3 | 1 | 0 |

**Figure S5. Overall survival following ibrutinib discontinuation stratified by BTK mutation status.** Kaplan-Meier curves for overall survival (OS) from the time of ibrutinib discontinuation ( $T_0$ ). Twenty-one patients had genotyping for BTK mutations performed; 7 patients had BTK<sup>C481S</sup>, and 14 patients had BTK<sup>WT</sup>. By univariate analysis, patients with BTK<sup>C481S</sup> had a significantly shorter median OS following  $T_0$  versus BTK<sup>WT</sup> (6.4 months vs. NR;  $p=0.026$ ). In an exploratory analysis, we evaluated the presence of BTK<sup>C481S</sup> against quadruple-class exposed disease for OS after  $T_0$ . In this model, only quadruple-class exposed disease was significantly associated with worse OS (HR 5.50, 95% CI 1.15-26.2;  $p=0.03$ ). BTK<sup>C481S</sup> was not independently associated with OS after adjusting for quadruple-class exposed disease ( $p=0.09$ ).

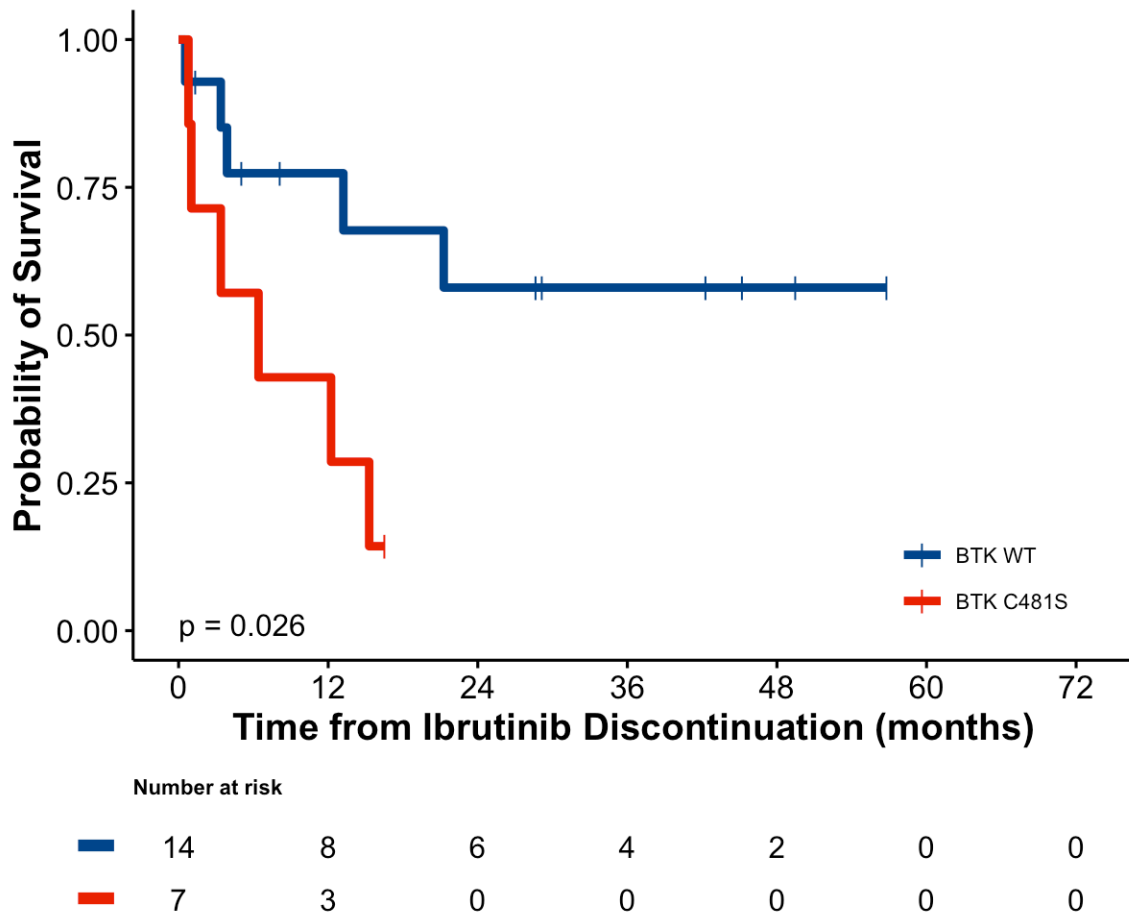

**Figure S6. Overall survival following ibrutinib discontinuation stratified by TP53 mutation status.** Kaplan-Meier curves for overall survival (OS) from the time of ibrutinib discontinuation ( $T_0$ ). Twenty patients had genotyping for TP53 mutations performed; 3 patients had TP53<sup>MUT</sup>, and 17 patients had TP53<sup>WT</sup>. Patients with TP53<sup>MUT</sup> had a significantly shorter median OS following  $T_0$  versus TP53<sup>WT</sup> (0.5 vs. 21.3 months;  $p=0.023$ ).

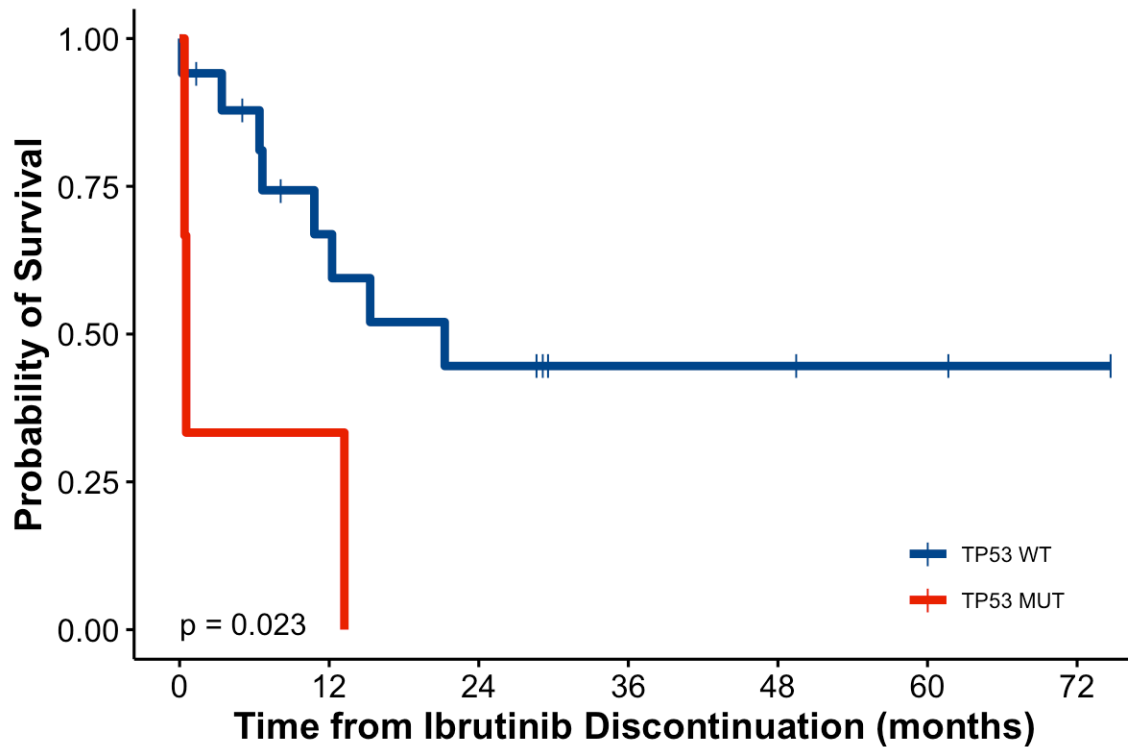

| Number at risk |          | 0  | 12 | 24 | 36 | 48 | 60 | 72 |
|----------------|----------|----|----|----|----|----|----|----|
| ■              | TP53 WT  | 17 | 9  | 6  | 3  | 3  | 2  | 1  |
| ■              | TP53 MUT | 3  | 1  | 0  | 0  | 0  | 0  | 0  |
